# Supplementary material for: Understanding the Origin of Luminescence in Porous Organosilica Films with Various Organic Components
Source: Preprints.org preprint supplement (doi:10.20944/preprints202303.0348.v1), 2023-03-20
Supplement: Supplementary file 1 [file supplementary]

# Supplementary Materials

## Understanding the Origin of Luminescence in Porous Organosilica Films with Various Organic Components

Md Rasadujjaman <sup>1,2,\*</sup>, Jinming Zhang <sup>1</sup>, Dmitry A. Spassky <sup>3,4</sup>, Sergej Naumov <sup>5</sup>, Alexey S. Vishnevskiy <sup>6</sup>, Konstantin A. Vorotilov <sup>6</sup>, Jiang Yan <sup>1</sup>, Jing Zhang <sup>1,\*</sup>, and Mikhail R. Baklanov <sup>1,6,7</sup>

<sup>1</sup> Department of Microelectronics, North China University of Technology, Beijing 100144, China; jinming@naura.com (J.M.Z.); jiangyan@ncut.edu.cn (J.Y.); zhangj@ncut.edu.cn (J.Z.)

<sup>2</sup> Department of Physics, Mawlana Bhashani Science and Technology University, Santosh, Tangail-1902, Bangladesh; rasadphy@mbstu.ac.bd (M.R.)

<sup>3</sup> Skobeltsyn Institute of Nuclear Physics, Lomonosov Moscow State University, 119991 Moscow, Russia; deris2002@mail.ru (D.A.S.)

<sup>4</sup> Institute of Physics, University of Tartu, 50411 Tartu, Estonia

<sup>5</sup> Leibniz Institute of Surface Engineering (IOM), Leipzig 04318, Germany; sergej.naumov@iom-leipzig.de (S.N.)

<sup>6</sup> MIREA - Russian Technological University (RTU MIREA), Moscow 119454, Russian Federation; alexeysw@mail.ru (A.S.V.); vorotilov@live.ru (K.A.V.); baklanovmr@gmail.com (M.R.B.)

<sup>7</sup> European Centre for Knowledge and Technology Transfer (EUROTEx), Brussels 1040, Belgium

\* Correspondence: rasadphy@mbstu.ac.bd (M.R.); zhangj@ncut.edu.cn (J.Z.)

**Table S1:** Physical properties of organosilicate glass (OSG) films: first type: both ethylene bridges and methyl terminal groups with different precursor ratios (BTMSE/MTMS = 47/53 and 25/75); second type: a mixture of 1,3,5- and 1,3-benzene groups with a ratio of 1,3,5/1,3 = 1:3, 1,3,5/1,3 = 1:7 and 1,4-benzene bridges without porogen (1,4-BB) and with 30 wt% porogen (1,4-BB-p); third type: contains only methyl terminals without bridging groups (MTMS – without porogen, MTMS-p – with porogen). All films are completely cured in the air.

| OSG films          | EP data                     |               |           |                   |                  | FTIR data                                       |                                   |
|--------------------|-----------------------------|---------------|-----------|-------------------|------------------|-------------------------------------------------|-----------------------------------|
|                    | Porogen concentration (wt%) | <i>d</i> (nm) | <i>RI</i> | Open porosity (%) | Pore radius (nm) | Surface area (m <sup>2</sup> /cm <sup>3</sup> ) | Si-CH <sub>3</sub> /Si-O-Si ratio |
| BTMSE/MTMS = 47/53 | 0                           | 478.0         | 1.397     | 1.2               | 0.81             | 31.72                                           | 0.151                             |
|                    | 10                          | 493.6         | 1.349     | 12.2              | 0.81             | 303.26                                          | 0.142                             |
|                    | 20                          | 485.2         | 1.335     | 25.1              | 0.81             | 621.81                                          | 0.150                             |
|                    | 30                          | 465.0         | 1.306     | 32.5              | 1.42             | 459.89                                          | 0.183                             |
|                    | 50                          | 434.2         | 1.223     | 45.5              | 2.34             | 391.19                                          | 0.186                             |
| BTMSE/MTMS = 25/53 | 0                           | 617.3         | 1.453     | 8.7               | 0.81             | 216.43                                          | 0.299                             |
|                    | 10                          | 622.0         | 1.370     | 12.4              | 0.81             | 307.78                                          | 0.274                             |
|                    | 20                          | 598.3         | 1.357     | 19.4              | 0.97             | 401.66                                          | 0.283                             |
|                    | 30                          | 629.2         | 1.308     | 27.7              | 1.42             | 391.73                                          | 0.290                             |
|                    | 50                          | 585.1         | 1.200     | 50.6              | 4.65             | 219.34                                          | 0.298                             |
| 1,3,5/1,3BB (1:3)  | 0                           | 254.9         | 1.477     | -                 | -                | -                                               | 0.003                             |
|                    | 17                          | 356.4         | 1.316     | 28.9              | 0.81             | 716.39                                          | 0.026                             |
|                    | 23                          | 402.5         | 1.285     | 38.7              | 0.81             | 958.04                                          | 0.033                             |
|                    | 29                          | 420.1         | 1.270     | 42.4              | 0.81             | 1049.29                                         | 0.053                             |
|                    | 33                          | 416.3         | 1.268     | 42.9              | 0.92             | 935.01                                          | 0.059                             |
|                    | 38                          | 413.3         | 1.256     | 41.2              | 0.92             | 898.07                                          | 0.033                             |
|                    | 41                          | 398.9         | 1.285     | 37.9              | 1.1              | 691.59                                          | 0.053                             |
| 1,3,5/1,3BB (1:7)  | 0                           | 315.7         | 1.470     | -                 | -                | -                                               | 0.080                             |
|                    | 17                          | 377.7         | 1.324     | 26.2              | 0.81             | 649.56                                          | 0.014                             |
|                    | 23                          | 401.9         | 1.281     | 36.7              | 0.81             | 908.66                                          | 0.026                             |
|                    | 29                          | 405.4         | 1.272     | 40.4              | 0.81             | 999.99                                          | 0.058                             |
|                    | 33                          | 401.5         | 1.266     | 41.9              | 0.92             | 913.36                                          | 0.079                             |
|                    | 38                          | 419.3         | 1.259     | 41.9              | 0.92             | 913.25                                          | 0.038                             |
|                    | 41                          | 425.0         | 1.25      | 41.9              | 0.92             | 913.22                                          | 0.054                             |
| 1,4-BB             | 0                           | 177.0         | 1.559     | 10.3              | 0.92             | 229.56                                          | 0.001                             |
| 1,4-BB-p           | 30                          | 169.0         | 1.428     | 29.3              | 0.76             | 776.96                                          | 0.012                             |
| MTMS               | 0                           | 266.0         | 1.363     | 7.5               | 0.71             | 215.02                                          | 0.048                             |
| MTMS-p             | 30                          | 226.0         | 1.300     | 33.1              | 4.1              | 165.88                                          | 0.044                             |

\*OSG – Organosilicate glass, EP – Ellipsometric Porosimetry,

FTIR – Fourier Transform Infrared Spectroscopy, *d* – thickness, *RI* – Refractive index

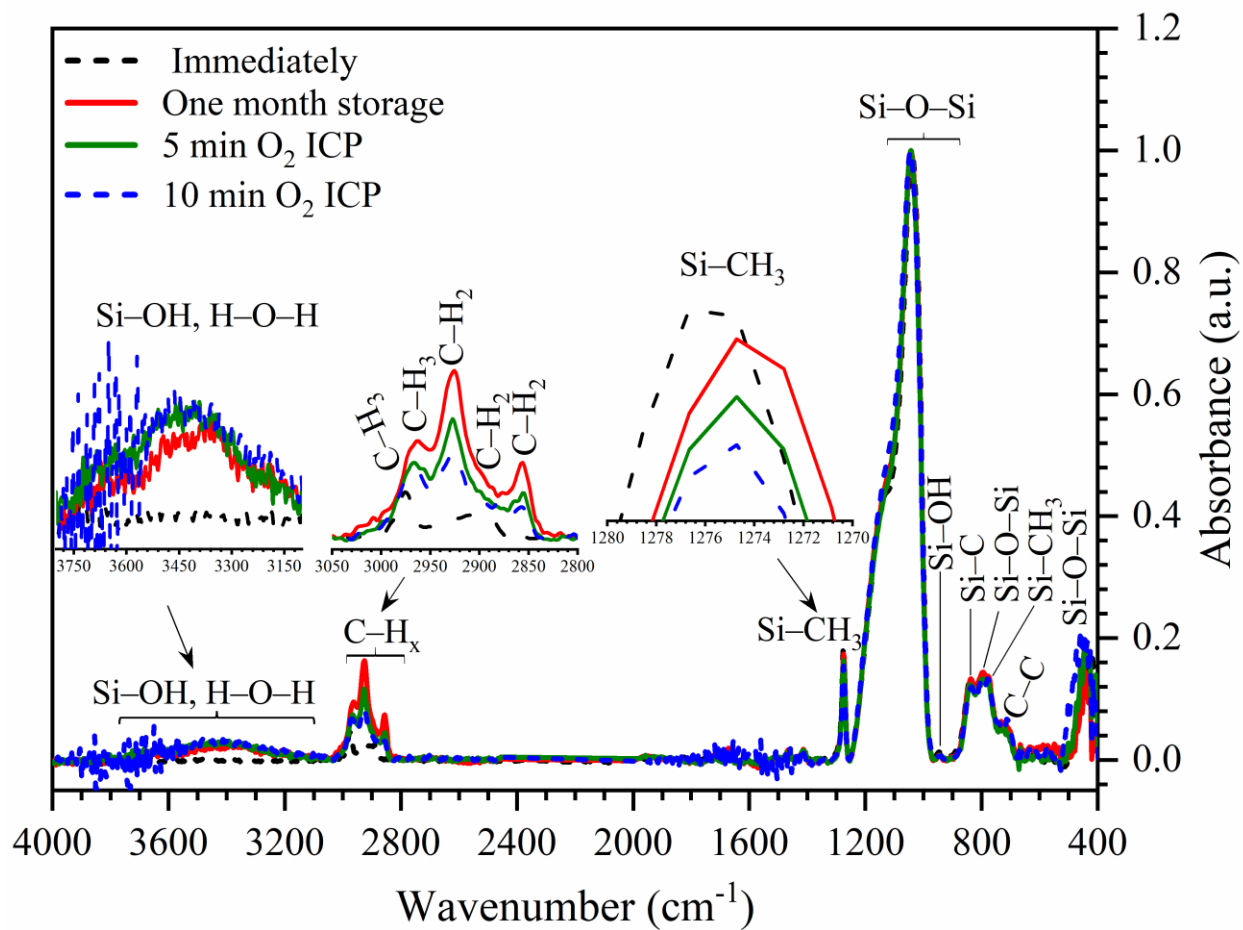

**Figure S1:** Effect of chemical composition during storage of film (BTMSE/MTMS = 47/53, 20 wt% Brij<sup>®</sup>30) in clean room environment and after soft oxygen ICP plasma. Loss of Si-CH<sub>3</sub> groups and hydrophilization was observed for films by using soft oxygen ICP plasma (remove the chemical residue).

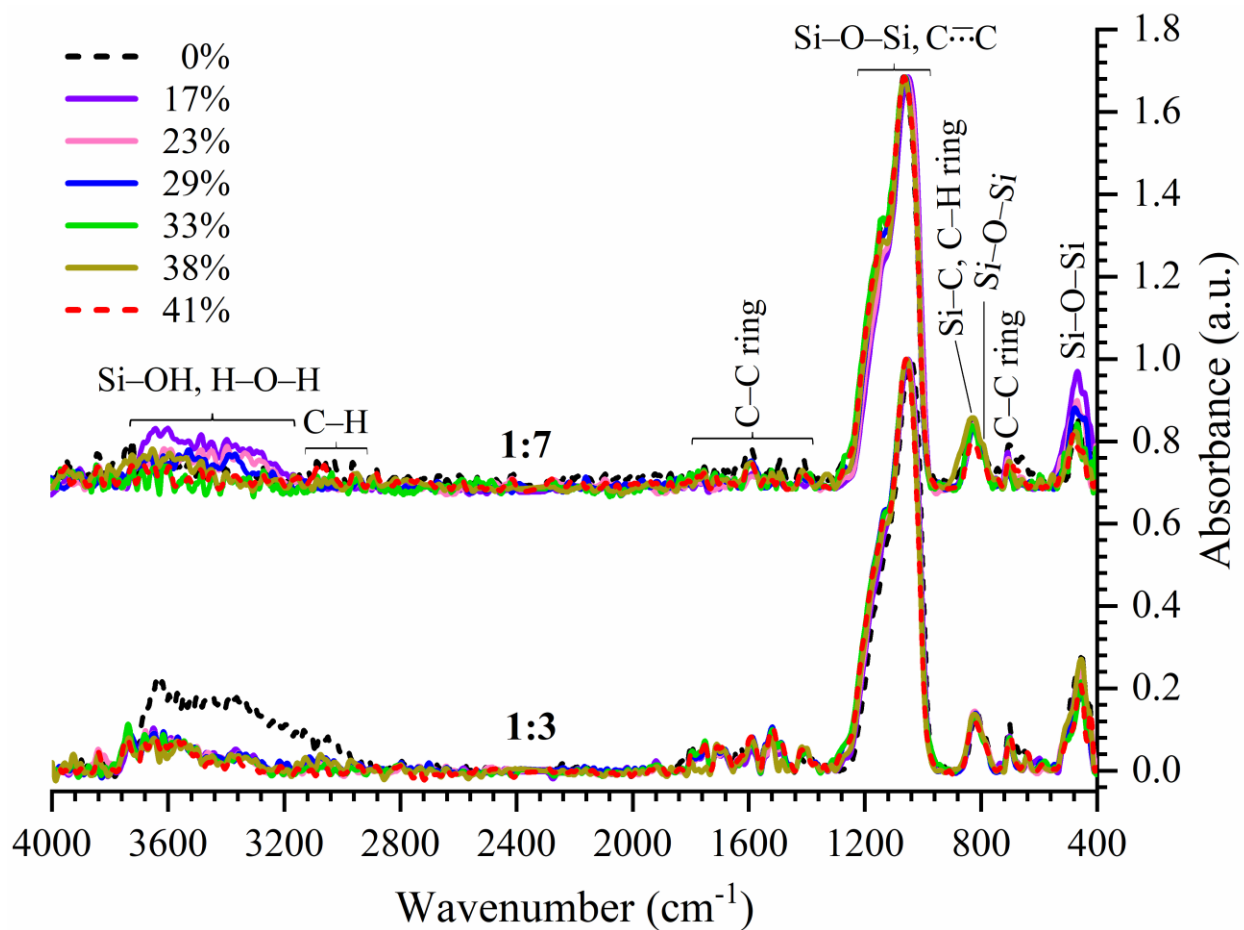

**Figure S2.** FTIR spectra of 1,3,5- and 1,3-benzene bridged ratio of 1:3 (bottom) and 1:7 (top) organosilica films with different porogen concentrations (0–41 wt%), soft bake at 200 °C and hard bake at 400 °C in air.

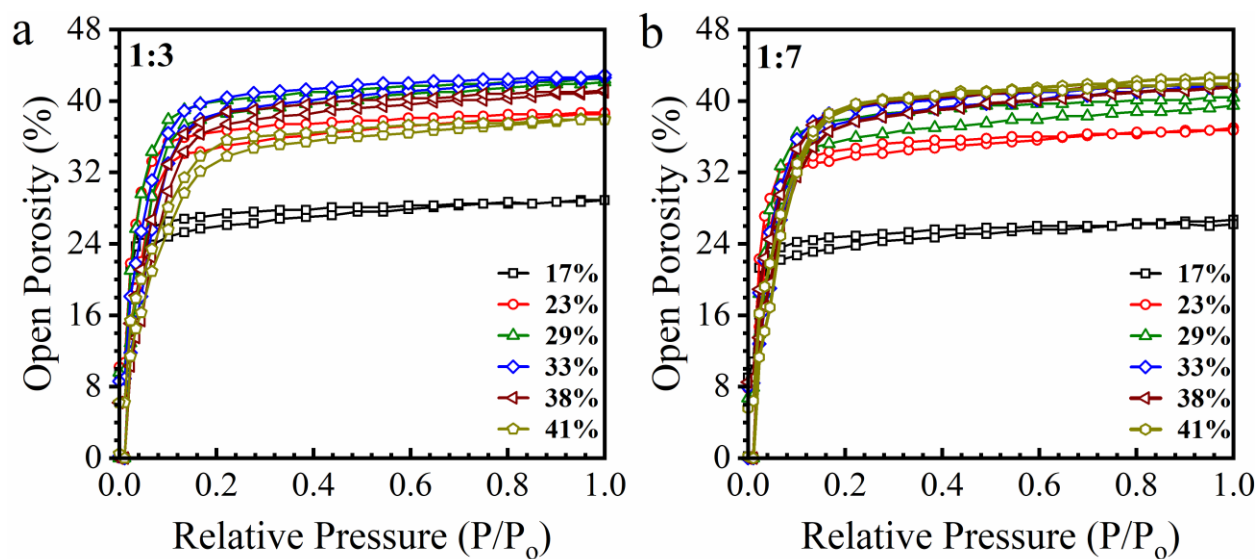

**Figure S3:** Adsorption-desorption isotherms for determining the value of open porosity, generated by ellipsometric porosimetry, of 1,3,5- and 1,3-benzene bridges ratio of 1:3 (a) and 1:7 (b) organosilica films with different porogen concentrations (17–41 wt%), soft bake at 150 °C and hard bake at 400 °C in air.

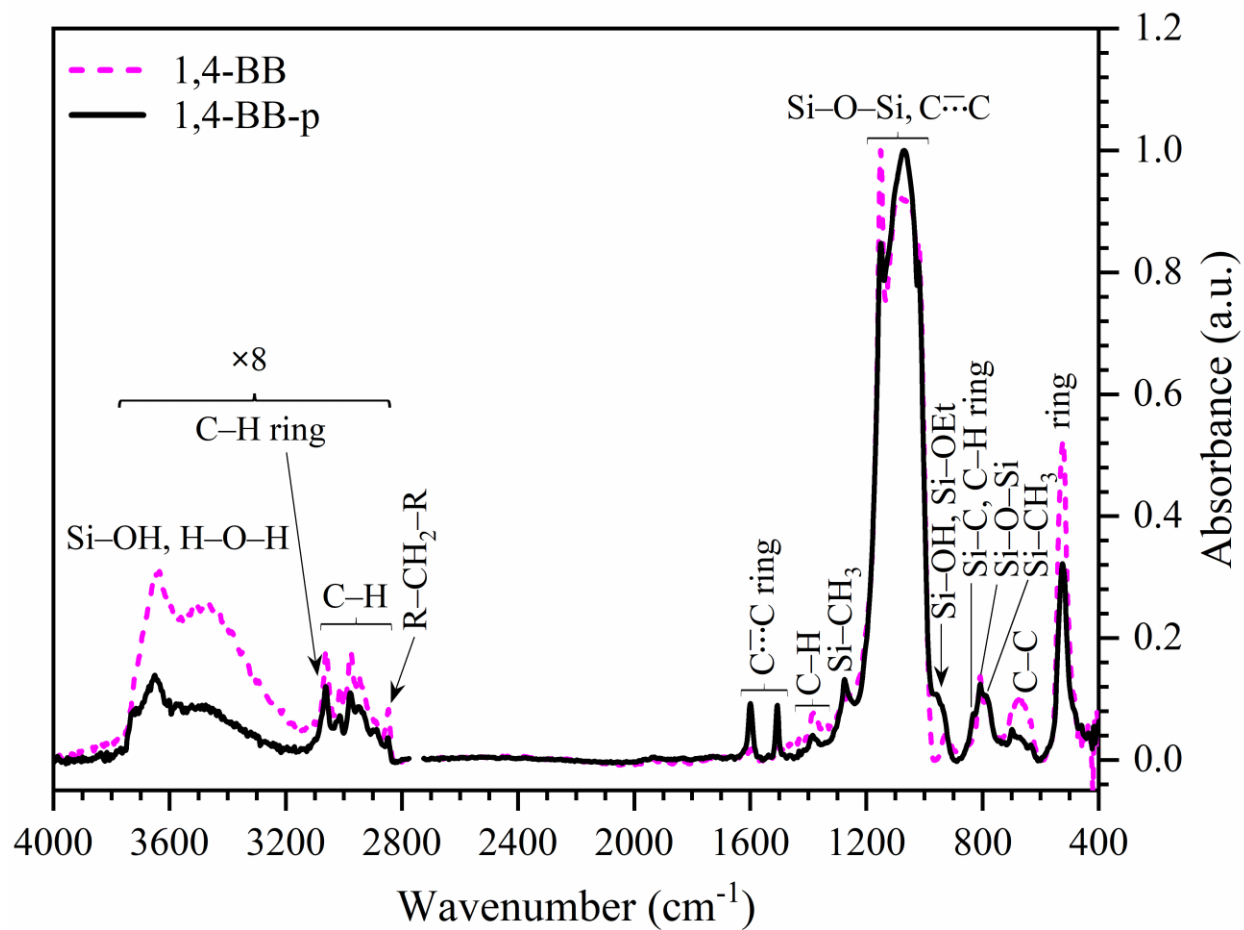

**Figure S4:** FTIR spectra of pure 1,4-benzene bridged organosilica films: dense (1,4-BB) and with 30 wt% porogen content 1,4-benzene bridged (1,4-BB-p) organosilica films, both the films were completely cured in air.

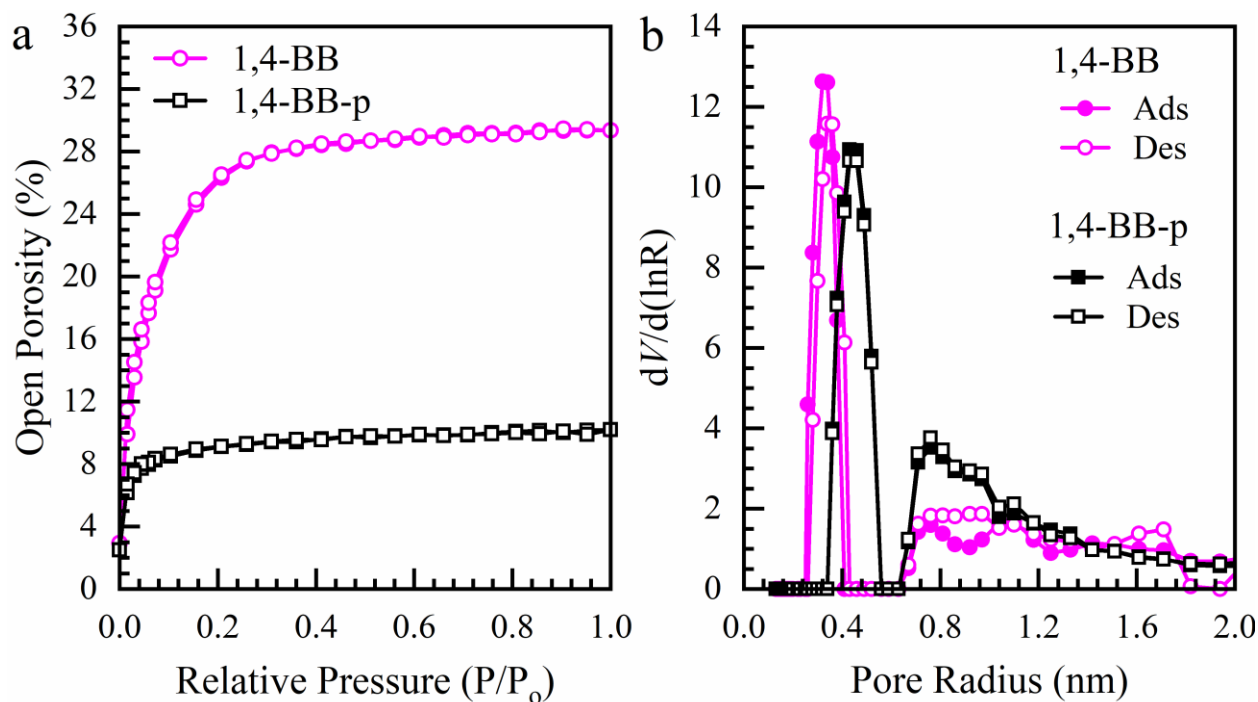

**Figure S5:** Adsorption-desorption isotherms for determining the value of open porosity (a) and pore size distribution (b), generated by ellipsometric porosimetry, of pure 1,4-benzene bridged organosilica films: dense (1,4-BB) and with 30 wt% porogen content 1,4-benzene bridged (1,4-BB-p) organosilica films, both the films were cured completely in air.

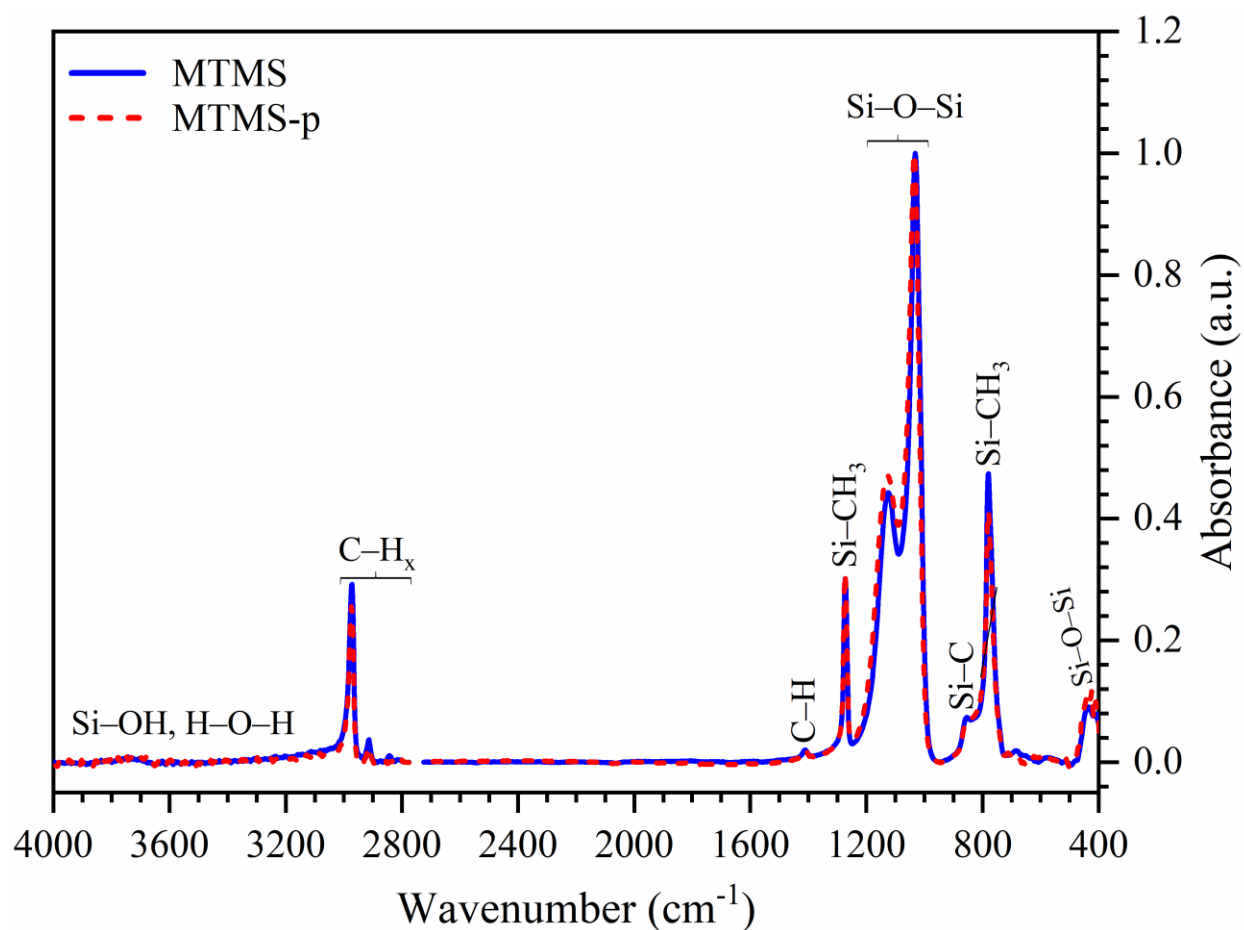

**Figure S6:** FTIR spectra of pure methyl-terminated organosilicate : dense (MTMS) and with 30 wt% porogen content methyl-terminated (MTMS-p), both the films were cured completely in air.

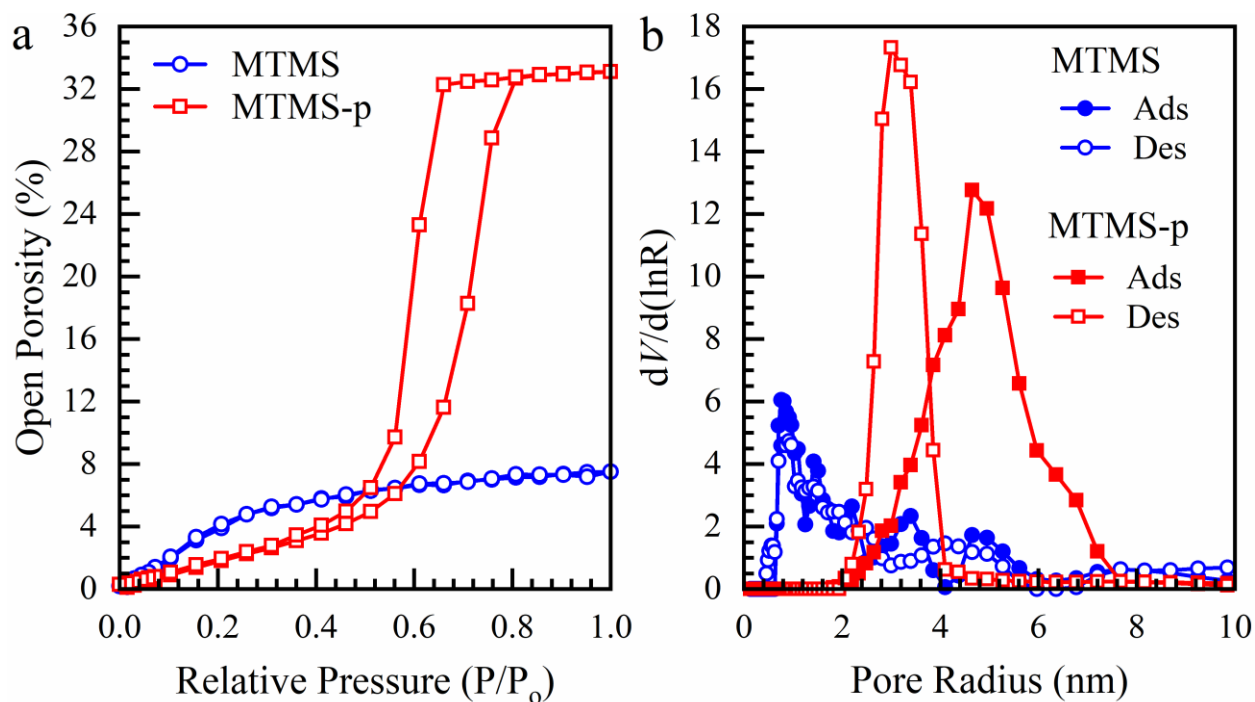

**Figure S7:** Adsorption-desorption isotherms for determining the value of open porosity (a) and pore size distribution (b), generated by ellipsometric porosimetry, of pure methyl-terminated organosilica films: dense (MTMS) and with 30 wt% porogen content methyl terminated (MTMS-p) organosilica films, both the films were cured completely in the air.

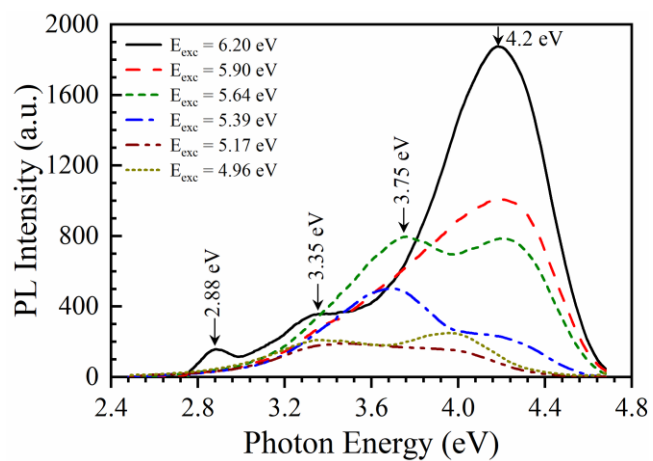

**Figure S8:** UV induced PL spectra measured at the different excitation energy for the ethylene bridged films (BTMSE/MTMS = 47/53).

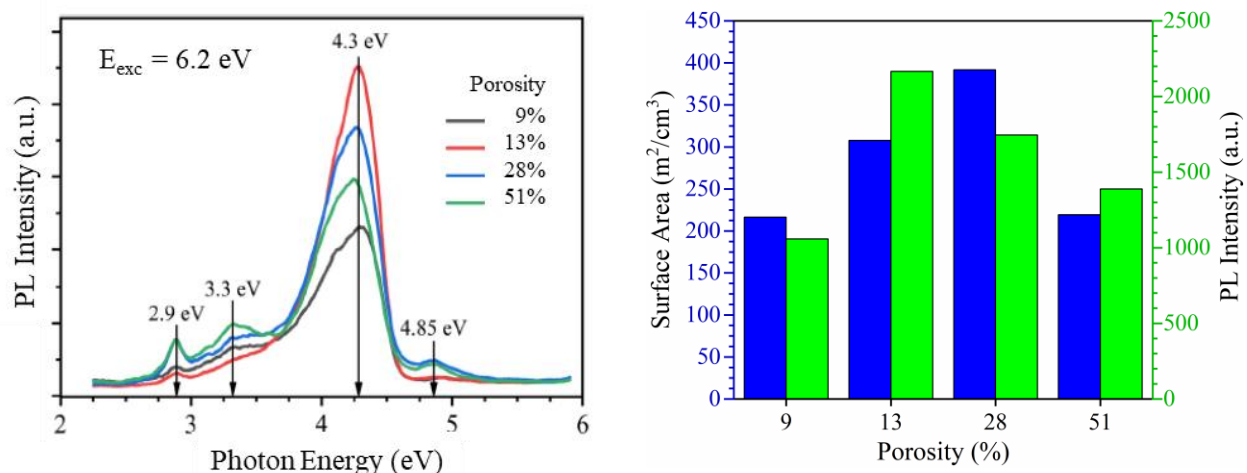

**Figure S9:** Correlation between 4.3 eV UV induced (upon excitation with light of 6.2 eV) room temperature PL emission with the measured surface area in hard baked OSG low-k films containing both methyl terminal and ethylene bridging groups (BTMSE/MTMS ratio of 25/75) with different porosity. However, the PL bands at 2.9, 3.3 and 4.85 eV have the highest intensity in highly porous films. It can be assumed that the reason is that the terminal methyl groups and hydrocarbon residues are mainly located on the pore wall surface. However, this assumption needs further study.
